# Supplementary material for: Neocentromeres Provide Chromosome Segregation Accuracy and Centromere Clustering to Multiple Loci along a Candida albicans Chromosome
Source: PubMed Central journal article supplement (PMC5035033; doi:10.1371/journal.pgen.1006317), 2016-09-23
Supplement: pgen.1006317.s012.pdf [file pgen.1006317.s012.pdf]

**Supplementary Table S1: Neocentromere genomic features.** Neocentromere positions and sizes based on ChIP-chip experiments with ORFs and ORF overlap identified using the Candida Genome Database. Essential genes were identified using the Yeast Genome Database. Transcription levels in YPD from Bruno *et al.* 2010 in are indicated in a log(2) scale of reads per kilobase per million mapped reads (RPKM) and fold-change relative to the median transcription level for all genes based on mean transcriptional activity in two YPD replicates with lighter shading indicating lower transcription levels and darker shading indicating higher transcription levels.

| Neocentromere position center coordinate (Chr5) (bp) | Estimated CENP-A binding coordinates (Chr5) (bp) | CENP-A binding domain size (bp) | ORFs within CENP-A region (Bold means essential gene in <i>S. cerevisiae</i> ) | Overlap with CENP-A (Bold means entire ORF overlaps) | Transcription in YPD (log2 RPKM) | Transcription in YPD (Fold-change relative to median transcript level in YPD) | Strain Number(s) of Isolates      |                                 | Strain Number of Original Transformant | Reference                            |
|------------------------------------------------------|--------------------------------------------------|---------------------------------|--------------------------------------------------------------------------------|------------------------------------------------------|----------------------------------|-------------------------------------------------------------------------------|-----------------------------------|---------------------------------|----------------------------------------|--------------------------------------|
|                                                      |                                                  |                                 |                                                                                |                                                      |                                  |                                                                               | Heterozygous <i>CEN5</i> deletion | Homozygous <i>CEN5</i> deletion |                                        |                                      |
| 4500                                                 | 3000-6000                                        | 3000                            | orf19.5698                                                                     | <b>810</b>                                           | 6.99                             | 5.1                                                                           | YJB9907                           | YJB10777                        | YJB9907                                | (Ketel <i>et al.</i> , 2009)         |
|                                                      |                                                  |                                 | orf19.5693                                                                     | 1,170 (3')                                           | 6.13                             | 2.8                                                                           |                                   |                                 |                                        |                                      |
| 72500                                                | 70500-74500                                      | 4000                            | orf19.952                                                                      | 904 (3')                                             | 4.12                             | 0.7                                                                           | YJB11650                          | YJB12028                        | YJB11649                               | This work.                           |
|                                                      |                                                  |                                 | orf19.951                                                                      | <b>489</b>                                           | 8.33                             | 12.8                                                                          |                                   |                                 |                                        |                                      |
|                                                      |                                                  |                                 | orf19.949                                                                      | 482 (3')                                             | 4.90                             | 1.2                                                                           |                                   |                                 |                                        |                                      |
| 106000                                               | 103000-109000                                    | 6000                            | orf19.938                                                                      | <b>1446</b>                                          | -1.51                            | 0.01                                                                          | YJB12408                          | YJB13284                        | YJB9907, YJB12408                      | This work.                           |
|                                                      |                                                  |                                 | orf19.936                                                                      | <b>2325</b>                                          | -4.60                            | 0.002                                                                         |                                   |                                 |                                        |                                      |
| 166000                                               | 163500-168500                                    | 5000                            | orf19.570                                                                      | <b>2145</b>                                          | -0.15                            | 0.04                                                                          | N/A                               | YJB10780                        | YJB9929                                | (Ketel <i>et al.</i> , 2009)         |
| 173500                                               | 171000-176000                                    | 5000                            | orf19.575                                                                      | <b>3750</b>                                          | 3.97                             | 0.6                                                                           | N/A                               | YJB10779                        | YJB9929                                | (Ketel <i>et al.</i> , 2009)         |
|                                                      |                                                  |                                 | orf19.576                                                                      | 441 (5')                                             | 4.96                             | 1.2                                                                           |                                   |                                 |                                        |                                      |
| 199000                                               | 196000-202000                                    | 6000                            | orf19.586                                                                      | 621 (5')                                             | 6.19                             | 2.9                                                                           | YJB12031                          | YJB12021                        | YJB9929                                | This work.                           |
|                                                      |                                                  |                                 | orf19.587                                                                      | <b>1194</b>                                          | 4.82                             | 1.1                                                                           |                                   |                                 |                                        |                                      |
|                                                      |                                                  |                                 | orf19.588                                                                      | <b>319</b>                                           | 4.76                             | 1.1                                                                           |                                   |                                 |                                        |                                      |
|                                                      |                                                  |                                 | orf19.1981                                                                     | <b>489</b>                                           | 5.22                             | 1.5                                                                           |                                   |                                 |                                        |                                      |
|                                                      |                                                  |                                 | orf19.1980                                                                     | <b>1599</b>                                          | -0.71                            | 0.02                                                                          |                                   |                                 |                                        |                                      |
| 208000                                               | 207000-209000                                    | 2000                            | orf19.1978                                                                     | 953 (5')                                             | 2.87                             | 0.3                                                                           | YJB12402                          | YJB12015                        | YJB9929                                | (Ketel <i>et al.</i> , 2009)         |
| 240500                                               | 237500-243500                                    | 6000                            | None                                                                           | N/A                                                  | N/A                              | N/A                                                                           | YJB12008                          | YJB12017                        | YJB9929                                | This work.                           |
| 426000                                               | 423000-429000                                    | 6000                            | orf19.3187                                                                     | 724 (5')                                             | 4.31                             | 0.8                                                                           | YJB10234                          | N/A                             | YJB10234                               | This work.                           |
|                                                      |                                                  |                                 | orf19.3185                                                                     | <b>2349</b>                                          | 7.08                             | 5.4                                                                           |                                   |                                 |                                        |                                      |
|                                                      |                                                  |                                 | orf19.3184                                                                     | <b>648</b>                                           | 4.10                             | 0.7                                                                           |                                   |                                 |                                        |                                      |
|                                                      |                                                  |                                 | orf19.3183                                                                     | <b>675</b>                                           | 6.07                             | 2.7                                                                           |                                   |                                 |                                        |                                      |
|                                                      |                                                  |                                 | orf19.3181.1                                                                   | 116 (3')                                             | 5.69                             | 2.1                                                                           |                                   |                                 |                                        |                                      |
| 459000                                               | 457000-461000                                    | 4000                            | orf19.3167                                                                     | 857 (3')                                             | 6.26                             | 3.1                                                                           | YJB12553                          | N/A                             | YJB12533                               | This work. (Thakur and Sanyal, 2013) |
|                                                      |                                                  |                                 | orf19.3166                                                                     | 2807 (5')                                            | 4.26                             | 0.8                                                                           |                                   |                                 |                                        |                                      |

|                      |                     |      |                        |             |       |      |                                                                                                 |          |                                                                                                 |                                               |
|----------------------|---------------------|------|------------------------|-------------|-------|------|-------------------------------------------------------------------------------------------------|----------|-------------------------------------------------------------------------------------------------|-----------------------------------------------|
| 464500<br>(Proximal) | 463000-<br>466000   | 3000 | orf19.3163             | <b>987</b>  | 3.76  | 0.5  | 11 isolates<br>(Ketel <i>et al.</i><br>strains:<br>YJB9909,<br>YJB9915,<br>YJB9916,<br>YJB9926) | YJB12549 | 11 isolates<br>(Ketel <i>et al.</i><br>strains:<br>YJB9909,<br>YJB9915,<br>YJB9916,<br>YJB9926) | This work.<br>(Ketel <i>et al.</i> ,<br>2009) |
|                      |                     |      | <b>orf19.3161</b>      | <b>963</b>  | 6.40  | 3.4  |                                                                                                 |          |                                                                                                 |                                               |
|                      |                     |      | NOVEL-<br>Ca21chr5-019 | 116 (3')    | 4.31  | 0.8  |                                                                                                 |          |                                                                                                 |                                               |
| 480000               | 478000-<br>482000   | 4000 | <b>orf19.4221</b>      | <b>1695</b> | 4.60  | 1.0  | YJB12331                                                                                        | N/A      | YJB12331                                                                                        | This work.<br>(Thakur and<br>Sanyal,<br>2013) |
|                      |                     |      | orf19.4222             | 1730 (5')   | 2.99  | 0.3  |                                                                                                 |          |                                                                                                 |                                               |
| 495500               | 493000-<br>498000   | 5000 | <b>orf19.4230</b>      | 223 (3')    | 7.02  | 5.2  | YJB10436                                                                                        | N/A      | YJB10436                                                                                        | This work.                                    |
| 755000               | 753000-<br>757000   | 4000 | orf19.2647             | <b>1587</b> | 2.31  | 0.2  | YJB9861                                                                                         | N/A      | YJB9861                                                                                         | This work.                                    |
|                      |                     |      | orf19.2646             | 950 (3')    | 2.62  | 0.2  |                                                                                                 |          |                                                                                                 |                                               |
| 800000               | 797000-<br>803000   | 6000 | orf19.6667             | <b>507</b>  | 4.70  | 1.0  | YJB11649                                                                                        | YJB12027 | YJB11649                                                                                        | This work.                                    |
|                      |                     |      | orf19.6668             | <b>510</b>  | 5.26  | 1.5  |                                                                                                 |          |                                                                                                 |                                               |
|                      |                     |      | orf19.6670             | <b>1383</b> | 4.16  | 0.7  |                                                                                                 |          |                                                                                                 |                                               |
|                      |                     |      | orf19.6671             | <b>1737</b> | 3.45  | 0.4  |                                                                                                 |          |                                                                                                 |                                               |
| 811500               | 810000-<br>813000   | 3000 | orf19.6676             | 307 (3')    | 5.12  | 1.4  | YJB9929                                                                                         | YJB12024 | YJB9929                                                                                         | (Ketel <i>et al.</i> ,<br>2009)               |
|                      |                     |      | orf19.6678             | <b>1122</b> | 2.66  | 0.3  |                                                                                                 |          |                                                                                                 |                                               |
| 826500               | 824000-<br>829000   | 5000 | orf19.1122             | <b>843</b>  | -2.85 | 0.01 | YJB12328                                                                                        | YJB12330 | YJB12328                                                                                        | This work.                                    |
|                      |                     |      | orf19.1121             | <b>822</b>  | 5.22  | 1.5  |                                                                                                 |          |                                                                                                 |                                               |
| 900000               | 897000-<br>903000   | 6000 | orf19.1285             | <b>2796</b> | 3.04  | 0.3  | YJB9930                                                                                         | YJB12018 | YJB9929                                                                                         | This work.                                    |
|                      |                     |      | orf19.1283             | 832 (3')    | 3.07  | 0.3  |                                                                                                 |          |                                                                                                 |                                               |
| 1047000              | 1044000-<br>1050000 | 6000 | orf19.3967             | 198 (3')    | 9.25  | 24.3 | YJB12407                                                                                        | YJB12019 | YJB9929                                                                                         | This work.                                    |
| 1056000              | 1054000-<br>1058000 | 4000 | orf19.3969             | 2014 (3')   | 2.65  | 0.3  | YJB9862                                                                                         | N/A      | YJB9862                                                                                         | This work.                                    |
