# Supplementary material for: Neocentromeres Provide Chromosome Segregation Accuracy and Centromere Clustering to Multiple Loci along a Candida albicans Chromosome
Source: PubMed Central journal article supplement (PMC5035033; doi:10.1371/journal.pgen.1006317), 2016-09-23
Supplement: pgen.1006317.s013.pdf [file pgen.1006317.s013.pdf]

**Supplementary Table S2: SNP-RFLP analysis of homozygous (whole chromosome loss) and heterozygous (recombination-based loss) FOA<sup>R</sup> isolates from fluctuation analysis.** The number of isolates with homozygous SNP markers at both ends of Chr5 are indicated along with the total number of FOA<sup>R</sup> isolates tested.

| Centromere/<br>Neocentromere Position | Number Chromosome Loss/Number FOA <sup>R</sup> Isolates Tested (%) |              |            |                  |
|---------------------------------------|--------------------------------------------------------------------|--------------|------------|------------------|
|                                       | 30°C/No Drug                                                       | 39°C/No Drug | 30°C/+NAM  | 30°C/+Nocodazole |
| Native centromere                     | 6/19 (32%)                                                         | 3/8 (38%)    | 5/8 (63%)  | 7/8 (88%)        |
| 4.5kb                                 | 12/15 (80%)                                                        | 6/8 (75%)    | 5/8 (63%)  | 8/8 (100%)       |
| 72.5kb                                | 14/16 (88%)                                                        | 8/8 (100%)   | 6/8 (75%)  | 7/8 (88%)        |
| 426kb                                 | 14/16 (88%)                                                        | 8/8 (100%)   | 8/8 (100%) | 5/8 (63%)        |
| 480kb                                 | 7/16 (44%)                                                         | 3/8 (38%)    | 3/8 (38%)  | 2/8 (25%)        |
| 800kb                                 | 11/16 (69%)                                                        | 8/8 (100%)   | 7/8 (88%)  | 3/8 (38%)        |
| 826.5kb                               | 11/15 (73%)                                                        | 4/8 (50%)    | 8/8 (100%) | 7/8 (88%)        |
| 900kb                                 | 11/16 (69%)                                                        | 4/8 (50%)    | 6/10 (60%) | 6/8 (75%)        |
