# Supplementary material for: Neocentromeres Provide Chromosome Segregation Accuracy and Centromere Clustering to Multiple Loci along a Candida albicans Chromosome
Source: PubMed Central journal article supplement (PMC5035033; doi:10.1371/journal.pgen.1006317), 2016-09-23
Supplement: pgen.1006317.s014.pdf [file pgen.1006317.s014.pdf]

**Supplementary Table S3: Centromere and neocentromere calls with Centurion algorithm**

| Centromere  | Genomic start | Genomic stop | WT Centurion Library |                                               | YJB10777 Centurion Library    |                                                         | YJB10780 Centurion Library    |                                                         |
|-------------|---------------|--------------|----------------------|-----------------------------------------------|-------------------------------|---------------------------------------------------------|-------------------------------|---------------------------------------------------------|
|             |               |              | Centurion call (WT)  | Distance from Centurion call to CEN edge (WT) | Centurion call (neocen 4.5kb) | Distance from Centurion call to CEN edge (neocen 4.5kb) | Centurion call (neocen 166kb) | Distance from Centurion call to CEN edge (neocen 166kb) |
| <i>CEN1</i> | 1562983       | 1565911      | 1564249              | 0                                             | 1564347                       | 0                                                       | 1563273                       | 0                                                       |
| <i>CEN2</i> | 1927141       | 1930100      | 1930097              | 0                                             | 1928709                       | 0                                                       | 1929645                       | 0                                                       |
| <i>CEN3</i> | 823238        | 826384       | 826605               | 221                                           | 824388                        | 0                                                       | 825641                        | 0                                                       |
| <i>CEN4</i> | 992531        | 996168       | 995997               | 0                                             | 994837                        | 0                                                       | 994630                        | 0                                                       |
| <i>CEN5</i> | 468726        | 471753       | 471356               | 0                                             | 5000                          | 0                                                       | 170292                        | 0                                                       |
| <i>CEN6</i> | 979972        | 983725       | 978028               | 1944                                          | 979794                        | 178                                                     | 979923                        | 49                                                      |
| <i>CEN7</i> | 425811        | 428711       | 427642               | 0                                             | 427527                        | 0                                                       | 427813                        | 0                                                       |
| <i>CENR</i> | 1743086       | 1747562      | 1743871              | 0                                             | 1744538                       | 0                                                       | 1743166                       | 0                                                       |
